# Supplementary material for: Novel Gene Rearrangements in the Mitochondrial Genomes of Cynipoid Wasps (Hymenoptera: Cynipoidea)
Source: MDPI journal article supplement (doi:10.3390/genes13050914), 2022-05-20
Supplement: s1 [file s1]

Supplementary tables

Table S1 Information of Cynipoidea species in this study.

| Voucher specimens | Species                         | Sex    | Locality                         | Date        | Collector/Collect type         | Identification reference |
|-------------------|---------------------------------|--------|----------------------------------|-------------|--------------------------------|--------------------------|
| ZJUH_20220001     | <i>Anacharis</i> sp.            | Male   | Zhangjiakou, Hebei, China        | 21-AUG-2005 | Ying Zhang                     | [1,2]                    |
| ZJUH_20220002     | <i>Aegilips</i> sp.             | Male   | Shangrao, Jiangxi, China         | 07-AUG-2015 | Ning Mao                       | [1,2]                    |
| ZJUH_20220003     | <i>Melanips</i> sp.             | Male   | Linshi, Tibet, China             | 09-AUG-2019 | Xiaofei Li                     | [1,2]                    |
| ZJUH_20220004     | <i>Prosaspicera validispina</i> | Female | Linshi, Tibet, China             | 16-AUG-2019 | Zekai Li                       | [1-3]                    |
| ZJUH_20220005     | <i>Pujadella villari</i>        | Female | Linshi, Tibet, China             | 16-AUG-2019 | Zekai Li                       | [1,4]                    |
| ZJUH_20220006     | <i>Endecameris</i> sp.          | Female | Tianmu Mountain, Zhejiang, China | 29-AUG-2018 | Zekai Li                       | [1,2]                    |
| ZJUH_20220007     | <i>Ganaspini</i> sp.            | Male   | Linshi, Tibet, China             | 04-AUG-2019 | Yellow trap                    | [1,2]                    |
| ZJUH_20220008     | <i>Trybliographa</i> sp.        | Male   | Linshi, Tibet, China             | 16-AUG-2019 | Xingzhou Ma                    | [1,2]                    |
| ZJUH_20220009     | <i>Figites</i> sp. 1            | Male   | Foping, Shaanxi, China           | 28-JUL-2013 | Jiangli Tan                    | [1,2]                    |
| ZJUH_20220010     | <i>Figites</i> sp. 2            | Male   | Sonoma, California, USA          | 07-SEP-2008 | Peter H. Kerr                  | [1,2]                    |
| ZJUH_20220011     | <i>Ibalia</i> sp.               | Male   | Shangrao, Jiangxi, China         | 07-AUG-2015 | Shajiangyang Mao               | [1,5]                    |
| ZJUH_20220012     | <i>Paramblynotus</i> sp.        | Female | Republic of the Congo            | 20-OCT-2008 | Yves Braet, Michael J. Sharkey | [1,2]                    |
| ZJUH_20220013     | <i>Oberthuerella sharkeyi</i>   | Female | Republic of the Congo            | 20-OCT-2008 | Yves Braet, Michael J. Sharkey | [1,2,6]                  |
| ZJUH_20220014     | <i>Tessmannella kiplingi</i>    | Female | Rikaze, Tiibet, China            | 01-AUG-2018 | Yellow trap                    | [1,2,6]                  |
| ZJUH_20220015     | <i>Saphonecrus</i> sp.          | Female | Shangrao, Jiangxi, China         | 07-AUG-2015 | Shajiangyang Mao               | [1,7,8]                  |
| ZJUH_20220016     | <i>Parnips nigripes</i>         | Female | Madrid, Spain                    | 19-MAR-2001 | Jose Luis Nieves-Aldrey        | [1,9]                    |

Table S2 The best schemes of partition and substitution models selected in nucleotide dataset.

| Optimal partition | Best Model | Partition names              |
|-------------------|------------|------------------------------|
| Partition 1       | GTR+I+G    | c1p2, c3p2, c2p2, a6p2       |
| Partition 2       | GTR+I+G    | n4lp1, n5p1, n4p1, n3p1      |
| Partition 3       | GTR+I+G    | cbp1, n1p1, c2p1, a6p1, c3p1 |
| Partition 4       | GTR+G      | c1p3, c3p3, a6p3, c2p3, n3p3 |
| Partition 5       | GTR+I+G    | n6p1, n2p1, a8p1             |
| Partition 6       | GTR+I+G    | n4p2, n4lp2, n5p2, n3p2      |
| Partition 7       | GTR+G      | n6p3, n1p3, cbp3             |
| Partition 8       | GTR+G      | n5p3, n4lp3, n4p3            |
| Partition 9       | GTR+I+G    | n1p2, cbp2                   |
| Partition 10      | GTR+I+G    | a8p2, n6p2, n2p2             |
| Partition 11      | GTR+I+G    | c1p1                         |
| Partition 12      | GTR+G      | n2p3, a8p3                   |

Table S3 Length of tRNA and rRNA genes in the Cynipoidea mitogenomes.

| Species                           | trnW | trnC | trnY | trnL2 | trnK | trnD | trnG | trnA | trnR | trnN | trnS1 | trnE | trnF | trnH | trnT | trnP | trnL1 | trnS2 | trnV | trnI | trnQ | trnM | rrnS | rrnL |
|-----------------------------------|------|------|------|-------|------|------|------|------|------|------|-------|------|------|------|------|------|-------|-------|------|------|------|------|------|------|
| <i>Anacharis</i> sp.              | 72   | 63   | 71   | 71    | 72   | 70   | 70   | 69   | 69   | 70   | 62    | 69   | 66   | 74   | 67   | 72   | 71    | 69    | 73   | 71   | 67   | 69   | 824  | 1406 |
| <i>Aegilips</i> sp.               | 67   | 68   | 67   | 65    | 69   | 67   | 66   | 57   | 65   | 65   | 61    | 72   | 64   | 65   | 64   | 72   | 67    | 69    | 66   | 68   | 68   | 68   | 792  | 1360 |
| <i>Melanips</i> sp.               | 65   | 68   | 72   | 69    | 77   | 68   | 73   | 72   | 70   | 67   | 63    | 67   | 68   | 73   | 67   | 68   | 71    | 67    | 70   | 68   | 71   | 72   | 877  | 1418 |
| <i>Prospicera<br/>validispina</i> | 68   | 69   | 68   | 67    | 70   | 66   | 54   | 66   | 63   | 65   | 63    | 68   | 69   | 69   | 63   | 64   | 65    | 67    | 67   | 69   | 70   | 67   | 848  | 1360 |
| <i>Pujadella villari</i>          | 67   | 69   | 72   | 69    | 69   | 70   | 68   | 68   | 71   | 67   | 64    | 68   | 65   | 53   | 67   | 66   | 68    | 68    | 70   | 66   | -    | 68   | 858  | 1464 |
| <i>Endecameris</i> sp.            | 72   | 65   | 65   | 65    | 72   | 74   | 69   | 66   | 69   | 65   | 60    | 68   | 66   | 71   | 65   | 77   | 67    | 67    | 66   | 65   | 71   | 63   | 879  | 1361 |
| <i>Ganaspini</i> sp.              | 68   | 64   | 68   | 68    | 67   | 73   | 68   | 67   | 70   | 73   | 63    | 69   | 64   | 65   | 61   | 69   | 70    | 67    | 68   | 70   | 70   | 67   | 822  | 1231 |
| <i>Trybliographa</i> sp.          | 67   | 66   | 65   | 66    | 69   | 69   | 66   | 66   | 66   | 67   | 60    | 65   | -    | 68   | 65   | 67   | 68    | 68    | 66   | 69   | 67   | 67   | 812  | 1375 |
| <i>Figites</i> sp. 1              | -    | 72   | 69   | 68    | 68   | 68   | 68   | 64   | 67   | -    | 65    | 66   | 65   | 64   | 65   | 69   | -     | -     | -    | 65   | 70   | 67   | 811  | 1384 |
| <i>Figites</i> sp. 2              | 66   | 67   | 70   | 69    | 69   | 68   | 66   | 66   | 68   | 69   | 63    | 66   | 67   | 66   | 67   | 66   | -     | 68    | 70   | 66   | 69   | 70   | 813  | 1355 |
| <i>Ibalia</i> sp.                 | 69   | 64   | 66   | 67    | 72   | 69   | 67   | 65   | 67   | 68   | 64    | 68   | 63   | 65   | 65   | 69   | 74    | 68    | 59   | 67   | 67   | 75   | 811  | 1357 |
| <i>Paramblynotus</i> sp.          | 66   | 63   | 64   | 66    | 64   | 64   | 67   | 66   | 70   | 67   | 60    | 69   | 64   | 66   | 63   | 65   | 69    | 66    | 69   | 65   | 69   | 68   | 824  | 1287 |
| <i>Oberthuerella<br/>sharkeyi</i> | 52   | 67   | 67   | 67    | 75   | 68   | 66   | 64   | 72   | 69   | 62    | 66   | 64   | 67   | 63   | 58   | 69    | 68    | 69   | 68   | 71   | 68   | 815  | 1362 |
| <i>Tessmannella<br/>kiplingi</i>  | 69   | 63   | 68   | 67    | 69   | 65   | 69   | 69   | 67   | 66   | 62    | 58   | 62   | 53   | 62   | 55   | 69    | 64    | 71   | 70   | 70   | 67   | 793  | 1362 |
| <i>Saphonecrus</i> sp.            | 68   | 69   | 65   | 70    | 69   | 66   | 68   | 70   | 69   | 69   | 64    | 67   | 67   | 69   | 64   | 66   | 72    | 68    | 68   | 69   | 70   | 68   | 844  | 1409 |
| <i>Parnips nigripes</i>           | 70   | 67   | 67   | 67    | 70   | 68   | 66   | 65   | 65   | 66   | 64    | 67   | 65   | 69   | 64   | 66   | 54    | 68    | 66   | 69   | 70   | 70   | 821  | 1377 |

Table S4 Relative synonymous codon usage in 16 Cynipoidea mitogenomes.

|        | <i>Anacharis</i> sp. |      | <i>Aegilips</i> sp. |      | <i>Melanips</i> sp. |      | <i>Prosaspicera</i><br><i>validispina</i> |      | <i>Pujadella</i><br><i>villari</i> |      | <i>Endecameris</i><br>sp. |      | Ganaspini sp. |      | <i>Trybliographa</i><br>sp. |      | <i>Figites</i> sp. 1 |      | <i>Figites</i> sp. 2 |      | <i>Ibalia</i> sp. |      | <i>Paramblynotus</i><br>sp. |      | <i>Oberthuerella</i><br><i>sharkeyi</i> |      | <i>Tessmannella</i><br><i>kiplingi</i> |      | <i>Saphonecrus</i><br>sp. |      | <i>Parnips</i><br><i>nigripes</i> |      |
|--------|----------------------|------|---------------------|------|---------------------|------|-------------------------------------------|------|------------------------------------|------|---------------------------|------|---------------|------|-----------------------------|------|----------------------|------|----------------------|------|-------------------|------|-----------------------------|------|-----------------------------------------|------|----------------------------------------|------|---------------------------|------|-----------------------------------|------|
| Codon  | Count                | RSCU | Count               | RSCU | Count               | RSCU | Count                                     | RSCU | Count                              | RSCU | Count                     | RSCU | Count         | RSCU | Count                       | RSCU | Count                | RSCU | Count                | RSCU | Count             | RSCU | Count                       | RSCU | Count                                   | RSCU | Count                                  | RSCU | Count                     | RSCU | Count                             | RSCU |
| UUU(F) | 285                  | 1.67 | 309                 | 1.84 | 343                 | 1.88 | 346                                       | 1.94 | 307                                | 1.77 | 329                       | 1.81 | 320           | 1.78 | 287                         | 1.68 | 309                  | 1.9  | 297                  | 1.79 | 374               | 1.96 | 387                         | 1.95 | 345                                     | 1.78 | 320                                    | 1.77 | 348                       | 1.89 | 343                               | 1.93 |
| UUC(F) | 57                   | 0.33 | 26                  | 0.16 | 22                  | 0.12 | 10                                        | 0.06 | 39                                 | 0.23 | 34                        | 0.19 | 39            | 0.22 | 55                          | 0.32 | 17                   | 0.1  | 35                   | 0.21 | 8                 | 0.04 | 10                          | 0.05 | 42                                      | 0.22 | 42                                     | 0.23 | 20                        | 0.11 | 12                                | 0.07 |
| UUA(L) | 368                  | 4.36 | 450                 | 4.93 | 500                 | 5.42 | 469                                       | 5.15 | 381                                | 4.24 | 479                       | 5.16 | 446           | 4.8  | 406                         | 4.27 | 502                  | 5.47 | 473                  | 5.12 | 553               | 5.78 | 591                         | 5.68 | 482                                     | 4.98 | 435                                    | 4.68 | 503                       | 5.18 | 553                               | 5.6  |
| UUG(L) | 30                   | 0.36 | 20                  | 0.22 | 11                  | 0.12 | 21                                        | 0.23 | 55                                 | 0.61 | 11                        | 0.12 | 19            | 0.2  | 31                          | 0.33 | 16                   | 0.17 | 16                   | 0.17 | 7                 | 0.07 | 3                           | 0.03 | 36                                      | 0.37 | 30                                     | 0.32 | 20                        | 0.21 | 12                                | 0.12 |
| CUU(L) | 38                   | 0.45 | 40                  | 0.44 | 21                  | 0.23 | 32                                        | 0.35 | 37                                 | 0.41 | 38                        | 0.41 | 40            | 0.43 | 43                          | 0.45 | 12                   | 0.13 | 30                   | 0.32 | 11                | 0.11 | 20                          | 0.19 | 24                                      | 0.25 | 24                                     | 0.26 | 24                        | 0.25 | 15                                | 0.15 |
| CUC(L) | 5                    | 0.06 | 9                   | 0.1  | 3                   | 0.03 | 3                                         | 0.03 | 3                                  | 0.03 | 3                         | 0.03 | 5             | 0.05 | 10                          | 0.11 | 1                    | 0.01 | 3                    | 0.03 | 0                 | 0    | 0                           | 0    | 0                                       | 0    | 3                                      | 0.03 | 3                         | 0.03 | 1                                 | 0.01 |
| CUA(L) | 66                   | 0.78 | 29                  | 0.32 | 18                  | 0.2  | 20                                        | 0.22 | 62                                 | 0.69 | 26                        | 0.28 | 46            | 0.5  | 79                          | 0.83 | 20                   | 0.22 | 32                   | 0.35 | 3                 | 0.03 | 10                          | 0.1  | 34                                      | 0.35 | 66                                     | 0.71 | 33                        | 0.34 | 10                                | 0.1  |
| CUG(L) | 0                    | 0    | 0                   | 0    | 0                   | 0    | 1                                         | 0.01 | 1                                  | 0.01 | 0                         | 0    | 1             | 0.01 | 1                           | 0.01 | 0                    | 0    | 0                    | 0    | 0                 | 0    | 0                           | 0    | 5                                       | 0.05 | 0                                      | 0    | 0                         | 0    | 2                                 | 0.02 |
| AUU(I) | 376                  | 1.66 | 442                 | 1.86 | 482                 | 1.97 | 446                                       | 1.89 | 388                                | 1.83 | 515                       | 1.93 | 457           | 1.81 | 387                         | 1.65 | 449                  | 1.92 | 456                  | 1.88 | 505               | 1.98 | 498                         | 1.96 | 477                                     | 1.87 | 452                                    | 1.83 | 463                       | 1.9  | 459                               | 1.94 |
| AUC(I) | 76                   | 0.34 | 33                  | 0.14 | 7                   | 0.03 | 25                                        | 0.11 | 36                                 | 0.17 | 19                        | 0.07 | 49            | 0.19 | 82                          | 0.35 | 18                   | 0.08 | 29                   | 0.12 | 6                 | 0.02 | 9                           | 0.04 | 32                                      | 0.13 | 41                                     | 0.17 | 24                        | 0.1  | 15                                | 0.06 |
| AUA(M) | 418                  | 1.86 | 377                 | 1.91 | 394                 | 1.92 | 399                                       | 1.89 | 349                                | 1.79 | 386                       | 1.94 | 389           | 1.92 | 335                         | 1.84 | 382                  | 1.92 | 376                  | 1.87 | 394               | 1.95 | 363                         | 1.97 | 340                                     | 1.85 | 370                                    | 1.88 | 381                       | 1.85 | 374                               | 1.93 |
| AUG(M) | 31                   | 0.14 | 18                  | 0.09 | 16                  | 0.08 | 23                                        | 0.11 | 42                                 | 0.21 | 11                        | 0.06 | 17            | 0.08 | 29                          | 0.16 | 16                   | 0.08 | 26                   | 0.13 | 10                | 0.05 | 6                           | 0.03 | 28                                      | 0.15 | 24                                     | 0.12 | 32                        | 0.15 | 14                                | 0.07 |
| GUU(V) | 53                   | 1.51 | 59                  | 2.05 | 54                  | 1.85 | 68                                        | 2.05 | 77                                 | 1.82 | 33                        | 1.43 | 61            | 2.05 | 67                          | 1.85 | 66                   | 1.96 | 69                   | 2.08 | 28                | 1.38 | 37                          | 1.92 | 48                                      | 1.94 | 67                                     | 2.39 | 58                        | 2.37 | 44                                | 1.56 |
| GUC(V) | 8                    | 0.23 | 3                   | 0.1  | 1                   | 0.03 | 5                                         | 0.15 | 5                                  | 0.12 | 1                         | 0.04 | 2             | 0.07 | 7                           | 0.19 | 1                    | 0.03 | 1                    | 0.03 | 1                 | 0.05 | 3                           | 0.16 | 6                                       | 0.24 | 2                                      | 0.07 | 4                         | 0.16 | 6                                 | 0.21 |
| GUA(V) | 71                   | 2.03 | 48                  | 1.67 | 59                  | 2.02 | 59                                        | 1.77 | 62                                 | 1.47 | 56                        | 2.43 | 52            | 1.75 | 57                          | 1.57 | 68                   | 2.01 | 56                   | 1.68 | 50                | 2.47 | 36                          | 1.87 | 44                                      | 1.78 | 36                                     | 1.29 | 33                        | 1.35 | 60                                | 2.12 |
| GUG(V) | 8                    | 0.23 | 5                   | 0.17 | 3                   | 0.1  | 1                                         | 0.03 | 25                                 | 0.59 | 2                         | 0.09 | 4             | 0.13 | 14                          | 0.39 | 0                    | 0    | 7                    | 0.21 | 2                 | 0.1  | 1                           | 0.05 | 1                                       | 0.04 | 7                                      | 0.25 | 3                         | 0.12 | 3                                 | 0.11 |
| UCU(S) | 86                   | 1.99 | 71                  | 1.85 | 100                 | 2.52 | 83                                        | 2    | 86                                 | 2.1  | 71                        | 1.62 | 78            | 1.79 | 83                          | 1.95 | 74                   | 1.9  | 74                   | 1.76 | 127               | 3.32 | 63                          | 1.69 | 63                                      | 1.57 | 63                                     | 1.6  | 90                        | 2.29 | 100                               | 2.61 |
| UCC(S) | 10                   | 0.23 | 17                  | 0.44 | 5                   | 0.13 | 4                                         | 0.1  | 24                                 | 0.59 | 20                        | 0.46 | 24            | 0.55 | 32                          | 0.75 | 6                    | 0.15 | 12                   | 0.29 | 4                 | 0.1  | 5                           | 0.13 | 10                                      | 0.25 | 13                                     | 0.33 | 9                         | 0.23 | 4                                 | 0.1  |
| UCA(S) | 122                  | 2.83 | 117                 | 3.05 | 105                 | 2.64 | 126                                       | 3.04 | 72                                 | 1.76 | 143                       | 3.26 | 119           | 2.73 | 95                          | 2.24 | 124                  | 3.18 | 123                  | 2.93 | 62                | 1.62 | 127                         | 3.4  | 129                                     | 3.2  | 115                                    | 2.92 | 106                       | 2.7  | 85                                | 2.22 |
| UCG(S) | 0                    | 0    | 0                   | 0    | 0                   | 0    | 4                                         | 0.1  | 12                                 | 0.29 | 0                         | 0    | 0             | 0    | 1                           | 0.02 | 0                    | 0    | 2                    | 0.05 | 0                 | 0    | 1                           | 0.03 | 4                                       | 0.1  | 5                                      | 0.13 | 1                         | 0.03 | 0                                 | 0    |
| CCU(P) | 66                   | 1.89 | 54                  | 2.08 | 67                  | 2.58 | 61                                        | 2.44 | 55                                 | 1.93 | 40                        | 1.58 | 49            | 1.9  | 44                          | 1.41 | 64                   | 2.42 | 62                   | 2.34 | 80                | 3.23 | 57                          | 2.3  | 48                                      | 1.83 | 51                                     | 2    | 56                        | 2.15 | 69                                | 2.65 |
| CCC(P) | 23                   | 0.66 | 9                   | 0.35 | 5                   | 0.19 | 2                                         | 0.08 | 16                                 | 0.56 | 5                         | 0.2  | 15            | 0.58 | 37                          | 1.18 | 2                    | 0.08 | 4                    | 0.15 | 2                 | 0.08 | 3                           | 0.12 | 9                                       | 0.34 | 11                                     | 0.43 | 9                         | 0.35 | 1                                 | 0.04 |
| CCA(P) | 48                   | 1.37 | 40                  | 1.54 | 32                  | 1.23 | 35                                        | 1.4  | 35                                 | 1.23 | 55                        | 2.18 | 38            | 1.48 | 42                          | 1.34 | 39                   | 1.47 | 38                   | 1.43 | 16                | 0.65 | 39                          | 1.58 | 46                                      | 1.75 | 36                                     | 1.41 | 39                        | 1.5  | 33                                | 1.27 |
| CCG(P) | 3                    | 0.09 | 1                   | 0.04 | 0                   | 0    | 2                                         | 0.08 | 8                                  | 0.28 | 1                         | 0.04 | 1             | 0.04 | 2                           | 0.06 | 1                    | 0.04 | 2                    | 0.08 | 1                 | 0.04 | 0                           | 0    | 2                                       | 0.08 | 4                                      | 0.16 | 0                         | 0    | 1                                 | 0.04 |
| ACU(T) | 59                   | 1.33 | 54                  | 1.33 | 52                  | 1.65 | 60                                        | 1.94 | 76                                 | 2.11 | 47                        | 1.59 | 61            | 1.72 | 75                          | 1.55 | 61                   | 1.92 | 64                   | 1.88 | 57                | 2.07 | 35                          | 1.32 | 50                                      | 1.67 | 51                                     | 1.7  | 54                        | 1.7  | 65                                | 2.1  |
| ACC(T) | 25                   | 0.56 | 16                  | 0.4  | 2                   | 0.06 | 5                                         | 0.16 | 17                                 | 0.47 | 8                         | 0.27 | 22            | 0.62 | 50                          | 1.04 | 3                    | 0.09 | 8                    | 0.24 | 1                 | 0.04 | 2                           | 0.08 | 6                                       | 0.2  | 15                                     | 0.5  | 9                         | 0.28 | 4                                 | 0.13 |
| ACA(T) | 91                   | 2.06 | 91                  | 2.25 | 71                  | 2.25 | 58                                        | 1.87 | 46                                 | 1.28 | 63                        | 2.14 | 59            | 1.66 | 66                          | 1.37 | 63                   | 1.98 | 61                   | 1.79 | 51                | 1.85 | 67                          | 2.53 | 62                                      | 2.07 | 53                                     | 1.77 | 64                        | 2.02 | 52                                | 1.68 |
| ACG(T) | 2                    | 0.05 | 1                   | 0.02 | 1                   | 0.03 | 1                                         | 0.03 | 5                                  | 0.14 | 0                         | 0    | 0             | 0    | 2                           | 0.04 | 0                    | 0    | 3                    | 0.09 | 1                 | 0.04 | 2                           | 0.08 | 2                                       | 0.07 | 1                                      | 0.03 | 0                         | 0    | 3                                 | 0.1  |
| GCU(A) | 30                   | 1.71 | 31                  | 1.8  | 44                  | 2.48 | 39                                        | 2.11 | 43                                 | 2.02 | 35                        | 2.09 | 24            | 1.5  | 22                          | 1.38 | 33                   | 2    | 36                   | 2.03 | 39                | 2.48 | 34                          | 2.34 | 29                                      | 1.97 | 31                                     | 1.97 | 26                        | 1.93 | 54                                | 2.73 |
| GCC(A) | 9                    | 0.51 | 10                  | 0.58 | 6                   | 0.34 | 2                                         | 0.11 | 16                                 | 0.75 | 4                         | 0.24 | 10            | 0.63 | 15                          | 0.94 | 2                    | 0.12 | 7                    | 0.39 | 2                 | 0.13 | 0                           | 0    | 3                                       | 0.2  | 5                                      | 0.32 | 2                         | 0.15 | 2                                 | 0.1  |
| GCA(A) | 31                   | 1.77 | 27                  | 1.57 | 20                  | 1.13 | 31                                        | 1.68 | 22                                 | 1.04 | 28                        | 1.67 | 28            | 1.75 | 25                          | 1.56 | 30                   | 1.82 | 26                   | 1.46 | 22                | 1.4  | 24                          | 1.66 | 25                                      | 1.69 | 24                                     | 1.52 | 26                        | 1.93 | 23                                | 1.16 |
| GCG(A) | 0                    | 0    | 1                   | 0.06 | 1                   | 0.06 | 2                                         | 0.11 | 4                                  | 0.19 | 0                         | 0    | 2             | 0.13 | 2                           | 0.13 | 1                    | 0.06 | 2                    | 0.11 | 0                 | 0    | 0                           | 0    | 2                                       | 0.14 | 3                                      | 0.19 | 0                         | 0    | 0                                 | 0    |
| UAU(Y) | 162                  | 1.62 | 170                 | 1.63 | 206                 | 1.89 | 191                                       | 1.82 | 178                                | 1.66 | 190                       | 1.83 | 148           | 1.71 | 118                         | 1.37 | 187                  | 1.79 | 179                  | 1.76 | 210               | 1.94 | 208                         | 1.93 | 197                                     | 1.82 | 187                                    | 1.72 | 199                       | 1.82 | 218                               | 1.95 |
| UAC(Y) | 38                   | 0.38 | 38                  | 0.37 | 12                  | 0.11 | 19                                        | 0.18 | 37                                 | 0.34 | 18                        | 0.17 | 25            | 0.29 | 54                          | 0.63 | 22                   | 0.21 | 24                   | 0.24 | 7                 | 0.06 | 7                           | 0.07 | 20                                      | 0.18 | 31                                     | 0.28 | 20                        | 0.18 | 6                                 | 0.05 |
| CAU(H) | 48                   | 1.45 | 49                  | 1.63 | 63                  | 1.97 | 52                                        | 1.73 | 49                                 | 1.53 | 50                        | 1.72 | 49            | 1.61 | 48                          | 1.5  | 60                   | 1.9  | 61                   | 1.94 | 54                | 1.93 | 60                          | 1.94 | 51                                      | 1.67 | 59                                     | 1.87 | 48                        | 1.55 | 58                                | 1.9  |
| CAC(H) | 18                   | 0.55 | 11                  | 0.37 | 1                   | 0.03 | 8                                         | 0.27 | 15                                 | 0.47 | 8                         | 0.28 | 12            | 0.39 | 16                          | 0.5  | 3                    | 0.1  | 2                    | 0.06 | 2                 | 0.07 | 2                           | 0.06 | 10                                      | 0.33 | 4                                      | 0.13 | 14                        | 0.45 | 3                                 | 0.1  |
| CAA(Q) | 47                   |      |                     |      |                     |      |                                           |      |                                    |      |                           |      |               |      |                             |      |                      |      |                      |      |                   |      |                             |      |                                         |      |                                        |      |                           |      |                                   |      |

|        |     |      |     |      |     |      |     |      |     |      |     |      |     |      |     |      |     |      |     |      |     |      |     |      |     |      |     |      |     |      |     |      |
|--------|-----|------|-----|------|-----|------|-----|------|-----|------|-----|------|-----|------|-----|------|-----|------|-----|------|-----|------|-----|------|-----|------|-----|------|-----|------|-----|------|
| CAG(Q) | 4   | 0.16 | 1   | 0.04 | 2   | 0.09 | 6   | 0.27 | 12  | 0.51 | 5   | 0.19 | 1   | 0.04 | 5   | 0.18 | 3   | 0.12 | 8   | 0.33 | 1   | 0.04 | 0   | 0    | 4   | 0.15 | 13  | 0.46 | 5   | 0.21 | 1   | 0.04 |
| AAU(N) | 222 | 1.71 | 275 | 1.82 | 265 | 1.96 | 263 | 1.93 | 203 | 1.59 | 242 | 1.85 | 216 | 1.72 | 181 | 1.58 | 258 | 1.89 | 232 | 1.8  | 277 | 1.99 | 299 | 1.97 | 244 | 1.83 | 259 | 1.77 | 262 | 1.83 | 265 | 1.91 |
| AAC(N) | 37  | 0.29 | 27  | 0.18 | 6   | 0.04 | 10  | 0.07 | 52  | 0.41 | 20  | 0.15 | 35  | 0.28 | 48  | 0.42 | 15  | 0.11 | 26  | 0.2  | 2   | 0.01 | 5   | 0.03 | 23  | 0.17 | 34  | 0.23 | 24  | 0.17 | 12  | 0.09 |
| AAA(K) | 137 | 1.81 | 133 | 1.89 | 139 | 1.93 | 136 | 1.96 | 119 | 1.72 | 128 | 1.91 | 147 | 1.87 | 128 | 1.83 | 137 | 1.89 | 140 | 1.85 | 148 | 1.97 | 143 | 1.97 | 148 | 1.85 | 136 | 1.79 | 154 | 1.93 | 138 | 1.97 |
| AAG(K) | 14  | 0.19 | 8   | 0.11 | 5   | 0.07 | 3   | 0.04 | 19  | 0.28 | 6   | 0.09 | 10  | 0.13 | 12  | 0.17 | 8   | 0.11 | 11  | 0.15 | 2   | 0.03 | 2   | 0.03 | 12  | 0.15 | 16  | 0.21 | 6   | 0.08 | 2   | 0.03 |
| GAU(D) | 40  | 1.4  | 55  | 1.75 | 57  | 2    | 54  | 1.89 | 51  | 1.67 | 49  | 1.75 | 41  | 1.55 | 39  | 1.42 | 52  | 1.93 | 50  | 1.82 | 49  | 2    | 55  | 1.96 | 52  | 1.82 | 49  | 1.85 | 53  | 1.83 | 51  | 1.89 |
| GAC(D) | 17  | 0.6  | 8   | 0.25 | 0   | 0    | 3   | 0.11 | 10  | 0.33 | 7   | 0.25 | 12  | 0.45 | 16  | 0.58 | 2   | 0.07 | 5   | 0.18 | 0   | 0    | 1   | 0.04 | 5   | 0.18 | 4   | 0.15 | 5   | 0.17 | 3   | 0.11 |
| GAA(E) | 68  | 1.89 | 53  | 1.8  | 61  | 1.82 | 64  | 1.91 | 37  | 1.17 | 70  | 1.94 | 67  | 1.81 | 54  | 1.66 | 64  | 1.78 | 53  | 1.61 | 68  | 2    | 61  | 1.97 | 61  | 1.82 | 47  | 1.52 | 55  | 1.59 | 65  | 1.91 |
| GAG(E) | 4   | 0.11 | 6   | 0.2  | 6   | 0.18 | 3   | 0.09 | 26  | 0.83 | 2   | 0.06 | 7   | 0.19 | 11  | 0.34 | 8   | 0.22 | 13  | 0.39 | 0   | 0    | 1   | 0.03 | 6   | 0.18 | 15  | 0.48 | 14  | 0.41 | 3   | 0.09 |
| UGU(C) | 23  | 1.53 | 28  | 1.93 | 23  | 1.92 | 21  | 1.83 | 23  | 1.64 | 19  | 2    | 24  | 2    | 22  | 1.76 | 23  | 1.92 | 25  | 2    | 25  | 1.92 | 25  | 1.85 | 24  | 1.71 | 23  | 1.84 | 29  | 1.87 | 30  | 2    |
| UGC(C) | 7   | 0.47 | 1   | 0.07 | 1   | 0.08 | 2   | 0.17 | 5   | 0.36 | 0   | 0    | 0   | 0    | 3   | 0.24 | 1   | 0.08 | 0   | 0    | 1   | 0.08 | 2   | 0.15 | 4   | 0.29 | 2   | 0.16 | 2   | 0.13 | 0   | 0    |
| UGA(W) | 70  | 1.65 | 73  | 1.85 | 70  | 1.77 | 73  | 1.87 | 54  | 1.32 | 79  | 1.95 | 70  | 1.79 | 68  | 1.74 | 71  | 1.87 | 67  | 1.72 | 75  | 1.97 | 70  | 1.92 | 69  | 1.89 | 63  | 1.7  | 68  | 1.84 | 76  | 1.95 |
| UGG(W) | 15  | 0.35 | 6   | 0.15 | 9   | 0.23 | 5   | 0.13 | 28  | 0.68 | 2   | 0.05 | 8   | 0.21 | 10  | 0.26 | 5   | 0.13 | 11  | 0.28 | 1   | 0.03 | 3   | 0.08 | 4   | 0.11 | 11  | 0.3  | 6   | 0.16 | 2   | 0.05 |
| CGU(R) | 10  | 1    | 11  | 1.13 | 18  | 1.71 | 19  | 1.85 | 5   | 0.48 | 8   | 0.8  | 14  | 1.37 | 15  | 1.54 | 18  | 1.85 | 13  | 1.27 | 12  | 1.2  | 10  | 0.98 | 14  | 1.3  | 18  | 1.71 | 12  | 1.23 | 11  | 1.07 |
| CGC(R) | 3   | 0.3  | 1   | 0.1  | 1   | 0.1  | 0   | 0    | 1   | 0.1  | 3   | 0.3  | 2   | 0.2  | 2   | 0.21 | 0   | 0    | 1   | 0.1  | 0   | 0    | 0   | 0    | 0   | 0    | 0   | 0    | 0   | 0    | 0   | 0    |
| CGA(R) | 24  | 2.4  | 24  | 2.46 | 21  | 2    | 19  | 1.85 | 23  | 2.19 | 26  | 2.6  | 23  | 2.24 | 20  | 2.05 | 21  | 2.15 | 23  | 2.24 | 28  | 2.8  | 31  | 3.02 | 29  | 2.7  | 21  | 2    | 23  | 2.36 | 28  | 2.73 |
| CGG(R) | 3   | 0.3  | 3   | 0.31 | 2   | 0.19 | 3   | 0.29 | 13  | 1.24 | 3   | 0.3  | 2   | 0.2  | 2   | 0.21 | 0   | 0    | 4   | 0.39 | 0   | 0    | 0   | 0    | 0   | 0    | 3   | 0.29 | 4   | 0.41 | 2   | 0.2  |
| AGU(S) | 26  | 0.6  | 22  | 0.57 | 24  | 0.6  | 25  | 0.6  | 25  | 0.61 | 18  | 0.41 | 25  | 0.57 | 24  | 0.56 | 19  | 0.49 | 32  | 0.76 | 16  | 0.42 | 19  | 0.51 | 23  | 0.57 | 23  | 0.58 | 28  | 0.71 | 19  | 0.5  |
| AGC(S) | 1   | 0.02 | 0   | 0    | 0   | 0    | 2   | 0.05 | 9   | 0.22 | 1   | 0.02 | 2   | 0.05 | 7   | 0.16 | 2   | 0.05 | 1   | 0.02 | 1   | 0.03 | 2   | 0.05 | 4   | 0.1  | 6   | 0.15 | 3   | 0.08 | 1   | 0.03 |
| AGA(S) | 84  | 1.95 | 68  | 1.77 | 81  | 2.04 | 80  | 1.93 | 68  | 1.66 | 93  | 2.12 | 81  | 1.86 | 75  | 1.76 | 75  | 1.92 | 72  | 1.71 | 93  | 2.43 | 79  | 2.11 | 82  | 2.04 | 71  | 1.8  | 65  | 1.66 | 94  | 2.46 |
| AGG(S) | 16  | 0.37 | 12  | 0.31 | 3   | 0.08 | 8   | 0.19 | 32  | 0.78 | 5   | 0.11 | 20  | 0.46 | 23  | 0.54 | 12  | 0.31 | 20  | 0.48 | 3   | 0.08 | 3   | 0.08 | 7   | 0.17 | 19  | 0.48 | 12  | 0.31 | 3   | 0.08 |
| GGU(G) | 27  | 0.73 | 29  | 0.84 | 31  | 0.83 | 36  | 0.97 | 27  | 0.64 | 38  | 1.13 | 34  | 0.93 | 30  | 0.75 | 45  | 1.15 | 40  | 1.01 | 15  | 0.43 | 24  | 0.69 | 39  | 1.08 | 37  | 0.99 | 33  | 0.87 | 24  | 0.64 |
| GGC(G) | 4   | 0.11 | 1   | 0.03 | 2   | 0.05 | 4   | 0.11 | 15  | 0.36 | 6   | 0.18 | 3   | 0.08 | 11  | 0.28 | 4   | 0.1  | 4   | 0.1  | 1   | 0.03 | 1   | 0.03 | 3   | 0.08 | 6   | 0.16 | 0   | 0    | 4   | 0.11 |
| GGA(G) | 86  | 2.32 | 83  | 2.41 | 98  | 2.61 | 90  | 2.43 | 31  | 0.74 | 86  | 2.55 | 66  | 1.81 | 72  | 1.8  | 77  | 1.97 | 78  | 1.97 | 115 | 3.33 | 95  | 2.73 | 86  | 2.39 | 55  | 1.48 | 87  | 2.3  | 97  | 2.6  |
| GGG(G) | 31  | 0.84 | 25  | 0.72 | 19  | 0.51 | 18  | 0.49 | 95  | 2.26 | 5   | 0.15 | 43  | 1.18 | 47  | 1.18 | 30  | 0.77 | 36  | 0.91 | 7   | 0.2  | 19  | 0.55 | 16  | 0.44 | 51  | 1.37 | 31  | 0.82 | 24  | 0.64 |

Table S5 Synonymous and nonsynonymous substitutional analysis of 13 proteinencoding genes.

| Genes        | Ka     | Ks     | Ka/Ks  |
|--------------|--------|--------|--------|
| <i>atp6</i>  | 0.2160 | 0.4137 | 0.5221 |
| <i>atp8</i>  | 0.3506 | 0.3096 | 1.1322 |
| <i>cox1</i>  | 0.1177 | 0.4494 | 0.2619 |
| <i>cox2</i>  | 0.2184 | 0.4107 | 0.5318 |
| <i>cox3</i>  | 0.2036 | 0.4434 | 0.4592 |
| <i>cytb</i>  | 0.1859 | 0.3787 | 0.4909 |
| <i>nad1</i>  | 0.1972 | 0.3913 | 0.5039 |
| <i>nad2</i>  | 0.3319 | 0.3241 | 1.0243 |
| <i>nad3</i>  | 0.2038 | 0.4126 | 0.4940 |
| <i>nad4</i>  | 0.2362 | 0.3696 | 0.6391 |
| <i>nad4L</i> | 0.2648 | 0.3498 | 0.7568 |
| <i>nad5</i>  | 0.2309 | 0.3909 | 0.5908 |
| <i>nad6</i>  | 0.3041 | 0.2566 | 1.1850 |

## References

1. Buffington, M.L.; Forshage, M.; Liljeblad, J.; Tang, C.T.; van Noort, S. World Cynipoidea (Hymenoptera): a key to higher-level groups. *Insect Syst. Divers.* **2020**, *4*, doi:10.1093/isd/ixaa003.
2. van Noort, S.; Buffington, M.L.; Forshage, M. Afrotropical Cynipoidea (Hymenoptera). *Zookeys* **2015**, 1-176, doi:10.3897/zookeys.493.6353.
3. Wang, J.; Ros-Farre, P.; Wang, Y. Review of Prosaspicera Kieffer (Hymenoptera: Figitidae: Aspicerinae) with description of two new species in China. *Entomotaxonomia* **2014**, *36*, 67-74.
4. Ros-Farre, P. Pujadella Ros-Farre, a new genus from the oriental region, with a description of two new species (Hymenoptera : Figitidae : Aspicerinae). *Zoological Studies* **2007**, *46*, 168-175.
5. Nordlander, G.; Liu, Z.W.; Ronquist, F. Phylogeny and historical biogeography of the cynipoid wasp family Ibaliidae (Hymenoptera). *Syst. Entomol.* **1996**, *21*, 151-165, doi:10.1046/j.1365-3113.1996.d01-4.x.
6. Buffington, M.L.; van Noort, S. Revision of the Afrotropical Oberthuerellinae (Cynipoidea, Liopteridae). *Zookeys* **2012**, 1-154, doi:10.3897/zookeys.202.2136.
7. Schweger, S.; Melika, G.; Tang, C.T.; Yang, M.M.; Stone, G.N.; Nicholls, J.A.; Sinclair, F.; Hearn, J.; Bozso, M.; Penzes, Z. New species of cynipid inquilines of the genus Saphonecrus (Hymenoptera: Cynipidae: Synergini) from the Eastern Palearctic, with a re-appraisal of known species world-wide. *Zootaxa* **2015**, *4054*, 1-84, doi:10.11646/zootaxa.3999.4.1.
8. Wang, Y.P.; Chen, X.X.; Pujade-Villar, J.; Wu, H.; He, J.H. The genus Saphonecrus Dalla Torre et Kieffer, 1910 (Hymenoptera: Cynipidae) in China, with descriptions of two new species. *Biologia* **2010**, *65*, 1034-1039, doi:10.2478/s11756-010-0120-9.
9. Ronquist, F.; Nieves-Aldrey, J.L. A new subfamily of Figitidae (Hymenoptera, Cynipoidea). *Zoological Journal of the Linnean Society* **2001**, *133*, 483-494, doi:10.1006/zjls.2001.0302.
